# Supplementary material for: FRET-reporter nanoparticles to monitor redox-induced intracellular delivery of active compounds
Source: Royal Society of Chemistry journal article supplement (doi:10.1039/c4ra00270a), 2014-01-01
Supplement: c4ra00270a1.pdf [file c4ra00270a1.pdf]

## Supplementary Figures: 'FRET-reporter nanoparticles to monitor redox-induced intracellular delivery of active compounds'

by Tina Gulin-Sarfraz,<sup>a</sup> Jawad Sarfraz,<sup>a‡</sup> Didem Şen Karaman,<sup>a‡</sup> Jixi Zhang,<sup>a‡</sup>  
Christina Oetken-Lindholm,<sup>b</sup> Alain Duchanoy,<sup>a</sup> Jessica M. Rosenholm<sup>a\*</sup> and Daniel Abankwa<sup>b\*</sup>

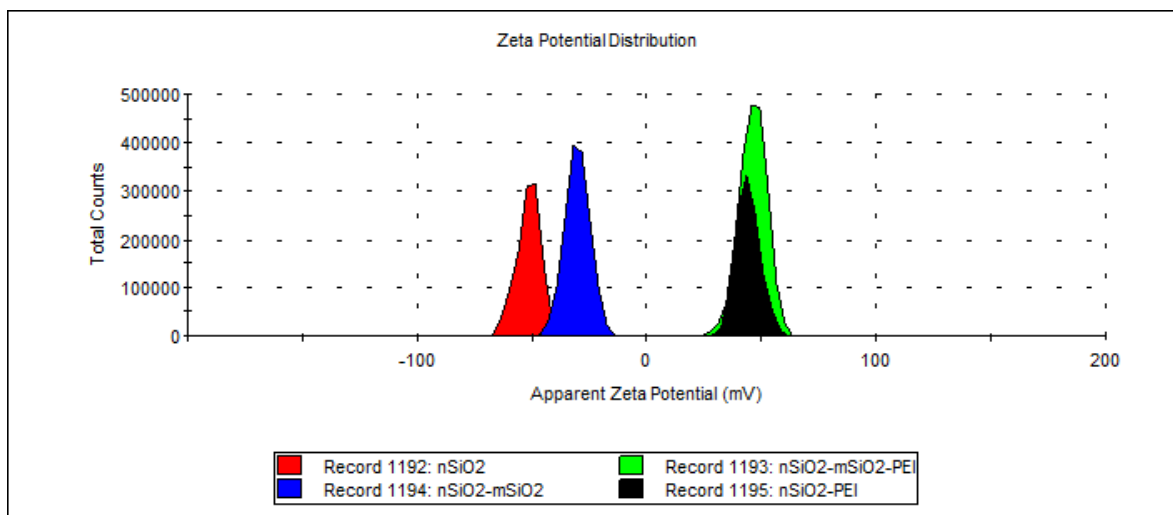

**Fig. S1** Electrokinetic measurements (zeta potential) of the plain silica cores ( $n\text{SiO}_2$ ), core-shell particles ( $n\text{SiO}_2@m\text{SiO}_2$ ), PEI-functionalized silica cores ( $n\text{SiO}_2@PEI$ ) and PEI-functionalized core-shell particles ( $n\text{SiO}_2@m\text{SiO}_2@PEI$ ).

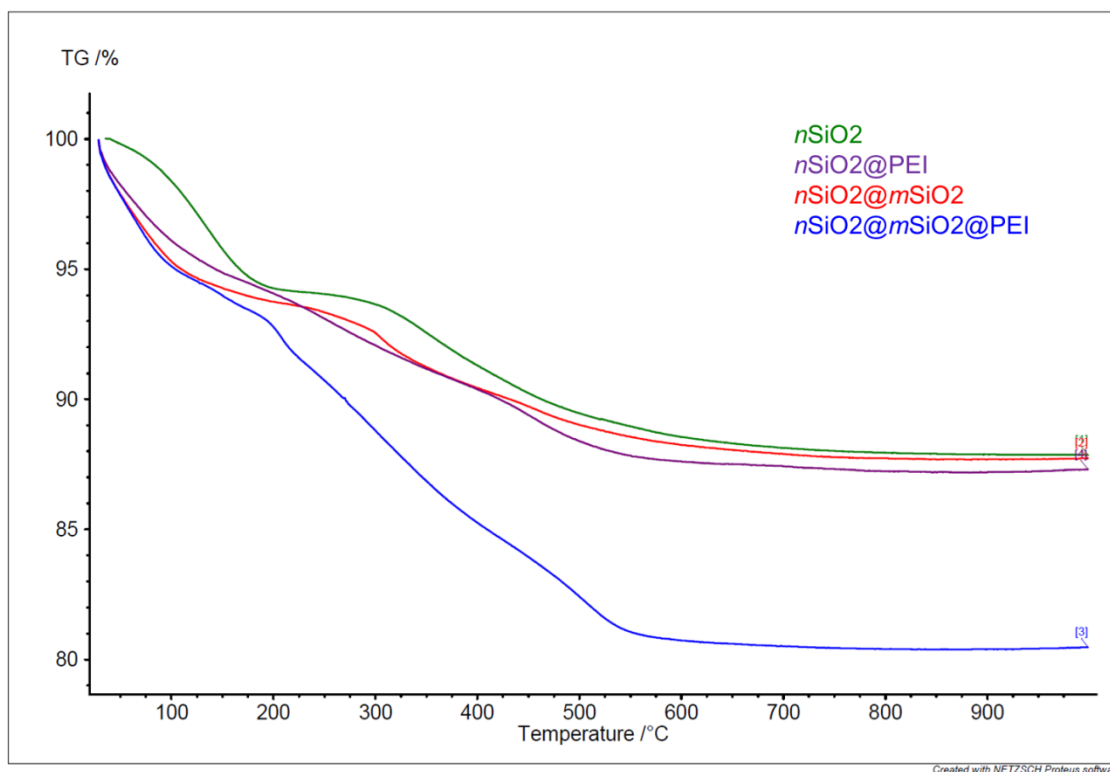

**Fig. S2** Thermogravimetric analysis (TGA) of the plain silica cores ( $n\text{SiO}_2$ ), core-shell particles ( $n\text{SiO}_2@m\text{SiO}_2$ ), PEI-functionalized silica cores ( $n\text{SiO}_2@PEI$ ) and PEI-functionalized core-shell particles ( $n\text{SiO}_2@m\text{SiO}_2@PEI$ ).

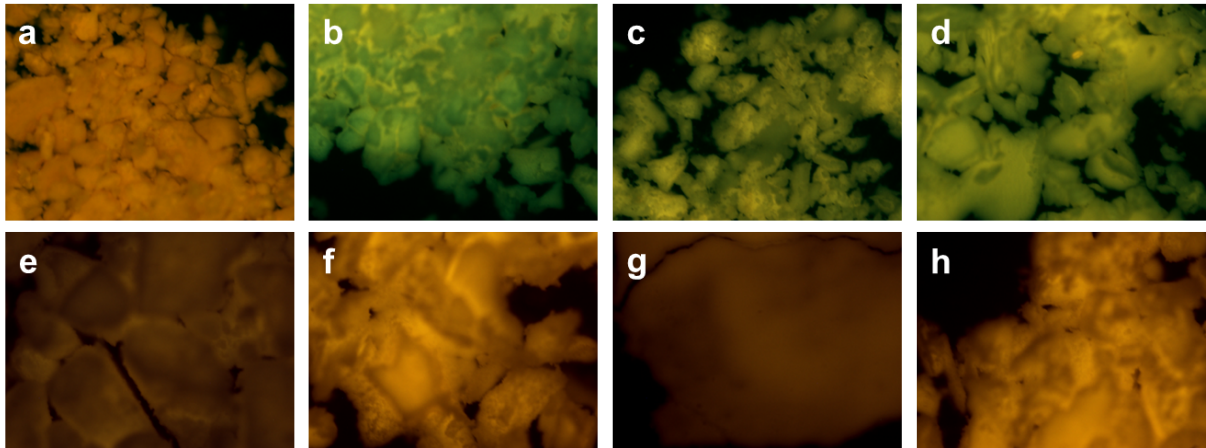

**Fig. S3 Loss of red emission from the cleavable particles, while no loss of red emission from the non-cleavable control particles, was observed after treatment with reducing agents.** Particles were incubated for one hour in test tubes with a concentration of a reducing agent (10 mM glutathione, GSH) corresponding to intracellular conditions at endosomal pH. As comparison equal concentration of an artificial reducing agent (DTT) was introduced at pH 5 and pH 7. The particles were dried on glass slides and imaged with a Nikon Microphot-FXA light microscope using UV light for excitation and a dual FITC-TRITC filter, which simultaneously gave rise to emission from both of the fluorescent dyes. Figure (a) represent the cleavable particles before introducing reducing agent, while (b-d) show the cleavable particles after introducing cleavable agents; DTT at pH 7 (b), DTT at pH 5 (c), and GSH at pH 5 (d). Figure (e) represents the non-cleavable control particles before introducing reducing agent, while (f-h) show the non-cleavable particles after introducing cleavable agents; DTT at pH 7 (f), DTT at pH 5 (g), and GSH at pH 5 (h).

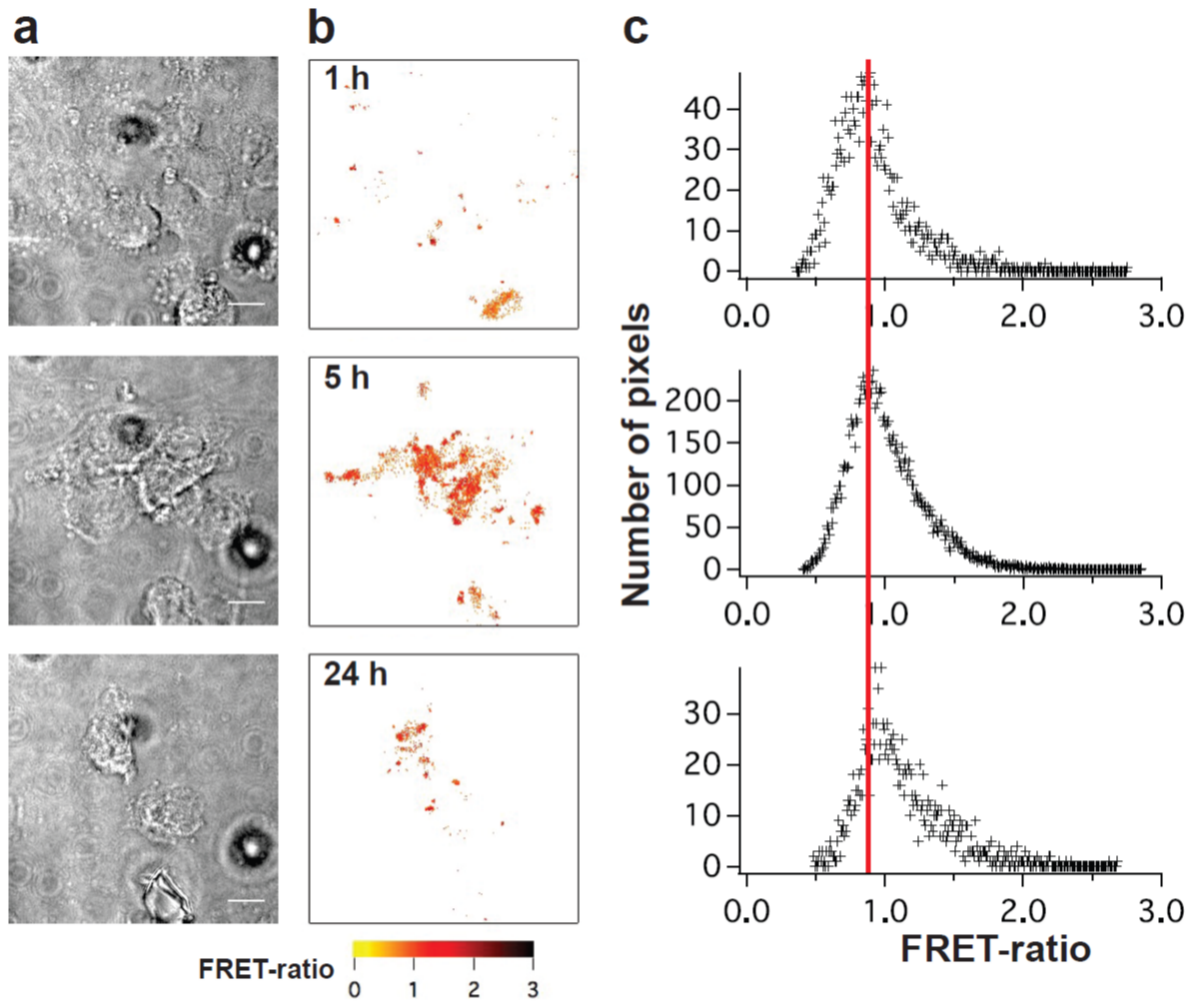

**Fig. S4 No loss of FRET was observed for the non-cleavable control particles after uptake into HeLa cells.** (a) Bright field images of cells incubated with silica particles that were labeled with a non-cleavable FRET-pair. The ratio donor:acceptor was kept 1:10. (b) FRET images of cells shown in (a) with FRET-level on silica particles color coded from yellow (low) to black (high). (c) Histograms of FRET-ratio per pixel of adjacent images shown in (b). Scale bars in (a) are also representative for (b) and are 10  $\mu\text{m}$ .
